# Supplementary material
Source: MDPI journal article supplement (https://www.mdpi.com/1424-2818/13/12/678)
Supplement: s1 [file s1]

**Table S3.** Coefficients of selection for the distance to land cover classes obtained from GLMM modelling of brown bears locations in northern Sweden during pre-calving, reindeer calving, moose calving, and post-calving periods.

|                                   | Pre-Calving |            |         | Reindeer Calving |            |         | Moose Calving |            |         | Post-Calving |            |         |
|-----------------------------------|-------------|------------|---------|------------------|------------|---------|---------------|------------|---------|--------------|------------|---------|
|                                   | Coefficient | Std. Error | P-Value | Coefficient      | Std. Error | P-Value | Coefficient   | Std. Error | P-Value | Coefficient  | Std. Error | P-Value |
| Intercept                         | -2.475      | 0.094      | <0.001  | -2.281           | 0.058      | <0.001  | -2.310        | 0.024      | <0.001  | -2.347       | 0.038      | <0.001  |
| Water                             | 0.050       | 0.016      | <0.01   | 0.069            | 0.004      | <0.001  | 0.005         | 0.006      | 0.43    | -0.034       | 0.005      | <0.001  |
| Wetland                           | -0.122      | 0.016      | <0.001  | -0.025           | 0.004      | <0.001  | -0.167        | 0.006      | <0.001  | -0.096       | 0.005      | <0.001  |
| Open Area                         | -0.312      | 0.017      | <0.001  | -0.030           | 0.004      | <0.001  | 0.127         | 0.005      | <0.001  | 0.108        | 0.005      | <0.001  |
| Deciduous Forest                  | -0.007      | 0.015      | 0.61    | 0.046            | 0.004      | <0.001  | -0.172        | 0.006      | <0.001  | -0.297       | 0.005      | <0.001  |
| Coniferous Forest                 | -0.507      | 0.018      | <0.001  | -0.154           | 0.004      | <0.001  | -0.047        | 0.005      | <0.001  | -0.072       | 0.004      | <0.001  |
| Coniferous Lichen Forests         | 0.399       | 0.012      | <0.001  | 0.090            | 0.004      | <0.001  | 0.095         | 0.005      | <0.001  | 0.086        | 0.0045     | <0.001  |
| Coniferous Moss Forests           | 0.034       | 0.016      | <0.05   | 0.078            | 0.005      | <0.001  | 0.111         | 0.006      | <0.001  | 0.232        | 0.005      | <0.001  |
| Mixed Forests                     | 0.424       | 0.017      | <0.001  | 0.268            | 0.005      | <0.001  | 0.162         | 0.006      | <0.001  | 0.025        | 0.006      | <0.001  |
| Old Clear Cuts                    | 0.269       | 0.014      | <0.001  | 0.011            | 0.004      | <0.05   | -0.105        | 0.006      | <0.05   | -0.033       | 0.005      | <0.001  |
| Young Forests                     | -0.140      | 0.023      | <0.001  | 0.187            | 0.006      | <0.001  | 0.143         | 0.008      | <0.001  | -0.244       | 0.008      | <0.001  |
| Public Roads with regular traffic | -0.349      | 0.024      | <0.001  | 0.049            | 0.007      | <0.001  | -0.030        | 0.008      | <0.001  | 0.043        | 0.007      | <0.001  |
| Gravel Roads                      | 0.352       | 0.021      | <0.001  | -0.130           | 0.005      | <0.001  | -0.123        | 0.007      | <0.001  | 0.302        | 0.006      | <0.001  |
| TRI                               | -0.257      | 0.015      | <0.001  | 0.026            | 0.004      | <0.001  | -0.013        | 0.005      | <0.05   | -0.146       | 0.005      | <0.001  |
