# Supplementary material
Source: MDPI journal article supplement (https://www.mdpi.com/1424-2818/13/12/678)
Supplement: s1 [file s1]

**Table S4.** Coefficients of selection for the distance to land cover classes obtained from GLMM modelling of brown bears locations in northern Sweden in relation to their predatory behaviour during pre-calving, reindeer calving, moose calving, and post-calving periods.

|                                                      | Pre-Calving |            |         | Reindeer Calving |            |         | Moose Calving |            |         | Post-Calving |            |         |
|------------------------------------------------------|-------------|------------|---------|------------------|------------|---------|---------------|------------|---------|--------------|------------|---------|
|                                                      | Coefficient | Std. Error | P-Value | Coefficient      | Std. Error | P-Value | Coefficient   | Std. Error | P-Value | Coefficient  | Std. Error | P-Value |
| Intercept                                            | -2.482      | 0.129      | <0.001  | -2.355           | 0.065      | <0.001  | -2.374        | 0.071      | <0.001  | -2.490       | 0.038      | <0.001  |
| Water                                                | 0.049       | 0.017      | <0.01   | 0.069            | 0.004      | <0.001  | 0.003         | 0.006      | 0.633   | -0.043       | 0.006      | <0.001  |
| Wetland                                              | -0.218      | 0.020      | <0.001  | -0.015           | 0.005      | <0.01   | -0.153        | 0.008      | <0.001  | -0.174       | 0.007      | <0.001  |
| Open Area                                            | -0.152      | 0.021      | <0.001  | 0.027            | 0.006      | <0.001  | 0.035         | 0.008      | <0.001  | 0.032        | 0.006      | <0.001  |
| Deciduous Forest                                     | -0.093      | 0.017      | <0.001  | -0.028           | 0.005      | <0.001  | -0.128        | 0.008      | <0.001  | -0.254       | 0.007      | <0.001  |
| Coniferous Forest                                    | -0.527      | 0.021      | <0.001  | -0.212           | 0.005      | <0.001  | -0.038        | 0.007      | <0.001  | -0.084       | 0.006      | <0.001  |
| Coniferous Lichen Forests                            | 0.660       | 0.019      | <0.001  | 0.112            | 0.006      | <0.001  | -0.010        | 0.009      | 0.282   | 0.253        | 0.007      | <0.001  |
| Coniferous Moss Forests                              | 0.059       | 0.018      | <0.01   | 0.063            | 0.005      | <0.001  | 0.129         | 0.007      | <0.001  | 0.249        | 0.006      | <0.001  |
| Mixed Forests                                        | 0.502       | 0.019      | <0.001  | 0.261            | 0.005      | <0.001  | 0.146         | 0.007      | <0.001  | 0.034        | 0.007      | <0.001  |
| Old Clear Cuts                                       | 0.281       | 0.017      | <0.001  | 0.058            | 0.006      | <0.001  | -0.053        | 0.008      | <0.001  | -0.105       | 0.007      | <0.001  |
| Young Forests                                        | -0.116      | 0.023      | <0.001  | 0.107            | 0.006      | <0.001  | 0.201         | 0.008      | <0.001  | -0.132       | 0.008      | <0.001  |
| Public Roads with regular traffic                    | -0.388      | 0.025      | <0.001  | 0.077            | 0.007      | <0.001  | -0.030        | 0.008      | <0.001  | -0.012       | 0.007      | 0.067   |
| Gravel Roads                                         | 0.311       | 0.020      | <0.001  | -0.092           | 0.005      | <0.001  | -0.103        | 0.007      | <0.001  | 0.274        | 0.006      | <0.001  |
| TRI                                                  | -0.225      | 0.016      | <0.001  | 0.037            | 0.004      | <0.001  | -0.015        | 0.006      | <0.01   | -0.148       | 0.005      | <0.001  |
| Predatory Behaviour Low (Fixed)                      | -0.777      | 0.211      | <0.001  | 0.264            | 0.100      | <0.01   | -0.114        | 0.104      | 0.273   | -0.257       | 0.057      | <0.001  |
| Predatory Behaviour (Low) × Open Area                | -0.404      | 0.041      | <0.001  | -0.140           | 0.010      | <0.001  | 0.200         | 0.011      | <0.001  | 0.141        | 0.010      | <0.001  |
| Predatory Behaviour (Low) × Deciduous Forest         | 0.300       | 0.041      | <0.001  | 0.156            | 0.009      | <0.001  | 0.007         | 0.014      | 0.589   | 0.001        | 0.013      | 0.934   |
| Predatory Behaviour (Low) × Coniferous Lichen Forest | -0.489      | 0.026      | <0.001  | -0.006           | 0.008      | 0.460   | 0.166         | 0.011      | <0.001  | -0.314       | 0.009      | <0.001  |
| Predatory Behaviour (Low) × Coniferous Forest        | 0.195       | 0.043      | <0.001  | 0.223            | 0.009      | <0.001  | -0.033        | 0.011      | <0.01   | -0.010       | 0.011      | 0.353   |
| Predatory Behaviour (Low) × Coniferous Moss Forest   | -0.391      | 0.060      | <0.001  | -0.005           | 0.013      | 0.704   | -0.205        | 0.016      | <0.001  | -0.116       | 0.013      | <0.001  |
| Predatory Behaviour (Low) × Mixed Forest             | -1.618      | 0.105      | <0.001  | 0.137            | 0.015      | <0.001  | -0.133        | 0.019      | <0.001  | -0.083       | 0.016      | <0.001  |
| Predatory Behaviour (Low) × Old Clear Cut            | -0.147      | 0.032      | <0.001  | -0.085           | 0.009      | <0.001  | -0.074        | 0.012      | <0.001  | 0.080        | 0.010      | <0.001  |
| Predatory Behaviour (Low) × Young Forest             | 0.559       | 0.061      | <0.001  | 0.065            | 0.014      | <0.001  | -0.419        | 0.022      | <0.001  | -1.180       | 0.029      | <0.001  |
| Predatory Behaviour (Low) × Wetland                  | 0.311       | 0.036      | <0.001  | -0.026           | 0.009      | <0.01   | -0.009        | 0.012      | 0.458   | 0.185        | 0.010      | 0.001   |
