# Supplementary material
Source: MDPI journal article supplement (https://www.mdpi.com/1424-2818/13/12/678)
Supplement: s1 [file s1]

**Table S2.** Number of GPS location points per bear for each month between April and July during 2010, 2011, and 2012.

| Month and Year of<br>GPS Locations | Number of GPS Location Points Recorded |        |        |        |        |        |        |        |        |         |         |         |         |         |         |
|------------------------------------|----------------------------------------|--------|--------|--------|--------|--------|--------|--------|--------|---------|---------|---------|---------|---------|---------|
|                                    | Bear ID                                |        |        |        |        |        |        |        |        |         |         |         |         |         |         |
|                                    | Bear 1                                 | Bear 2 | Bear 3 | Bear 4 | Bear 5 | Bear 6 | Bear 7 | Bear 8 | Bear 9 | Bear 10 | Bear 11 | Bear 12 | Bear 13 | Bear 14 | Bear 15 |
| April 2010                         |                                        |        |        |        |        |        |        |        |        |         |         |         |         |         |         |
| May 2010                           |                                        |        |        |        |        |        |        |        |        |         |         |         |         | 4112    |         |
| June 2010                          |                                        |        |        |        |        |        |        |        |        |         |         |         |         | 2107    |         |
| July 2010                          |                                        |        |        |        |        |        |        |        |        |         |         |         |         | 3134    |         |
| April 2011                         |                                        | 6      |        | 637    |        | 755    | 207    |        |        |         |         |         |         | 1837    |         |
| May 2011                           | 2450                                   | 2898   | 3851   | 6391   |        | 7097   | 4685   |        |        | 12,748  |         |         | 2702    | 2217    |         |
| June 2011                          | 1381                                   | 1498   | 2068   | 1638   |        | 2529   | 1854   |        | 1817   | 1621    |         |         | 1547    | 1654    |         |
| July 2011                          | 1681                                   | 1760   | 2387   | 1750   |        | 2784   | 2334   |        | 2505   | 4630    |         |         | 1589    | 3202    |         |
| April 2012                         |                                        |        | 103    |        |        |        |        |        |        | 234     |         |         |         | 500     |         |
| May 2012                           |                                        |        | 2249   | 609    | 6366   |        | 4282   | 4913   |        | 3379    | 2828    | 2340    |         | 6027    | 2172    |
| June 2012                          |                                        |        | 4559   | 1512   | 2441   |        | 2352   | 1614   |        | 5376    | 1055    | 2493    |         | 1644    | 1804    |
| July 2012                          |                                        |        | 150    | 124    | 162    |        | 133    | 126    |        | 118     |         |         |         | 256     |         |
