# Supplementary material
Source: MDPI journal article supplement (https://www.mdpi.com/1424-2818/13/12/678)
Supplement: s1 [file s1]

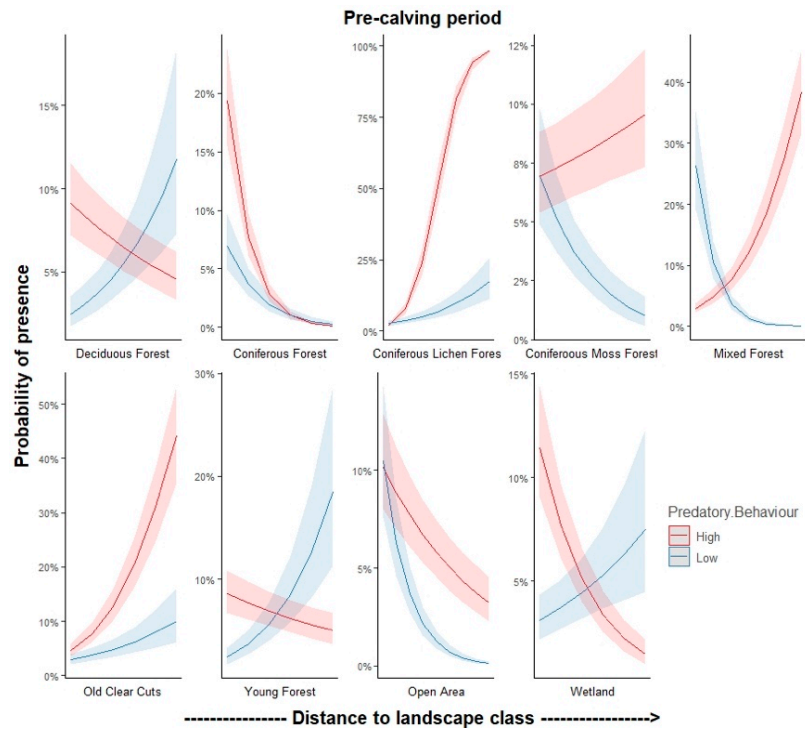

(a)

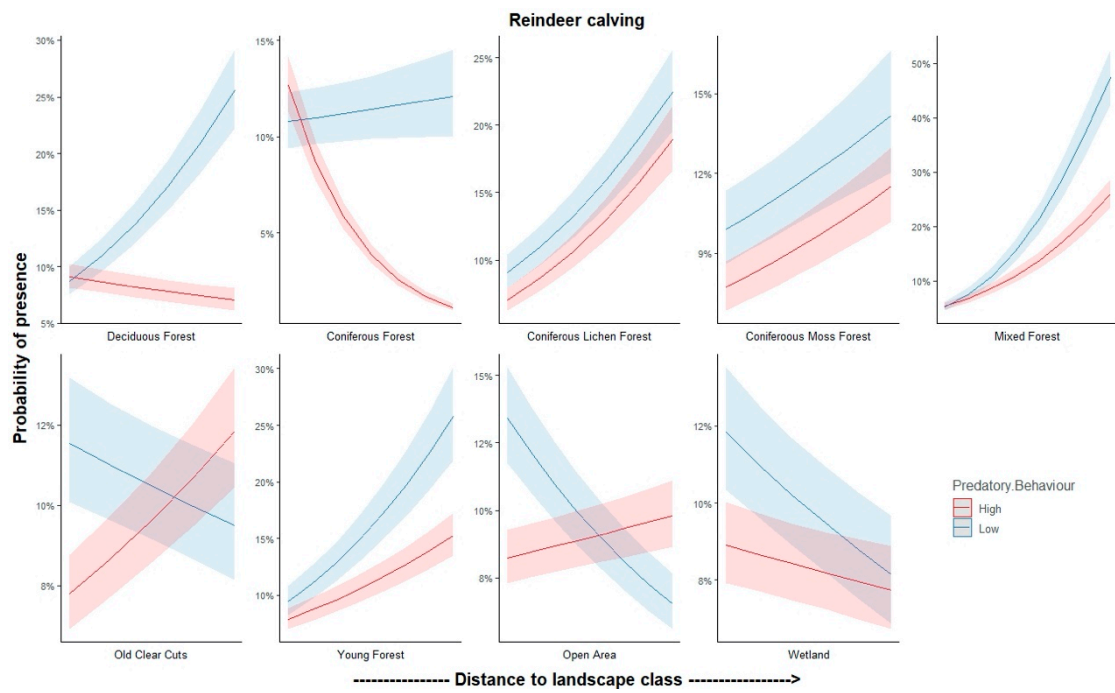

(b)

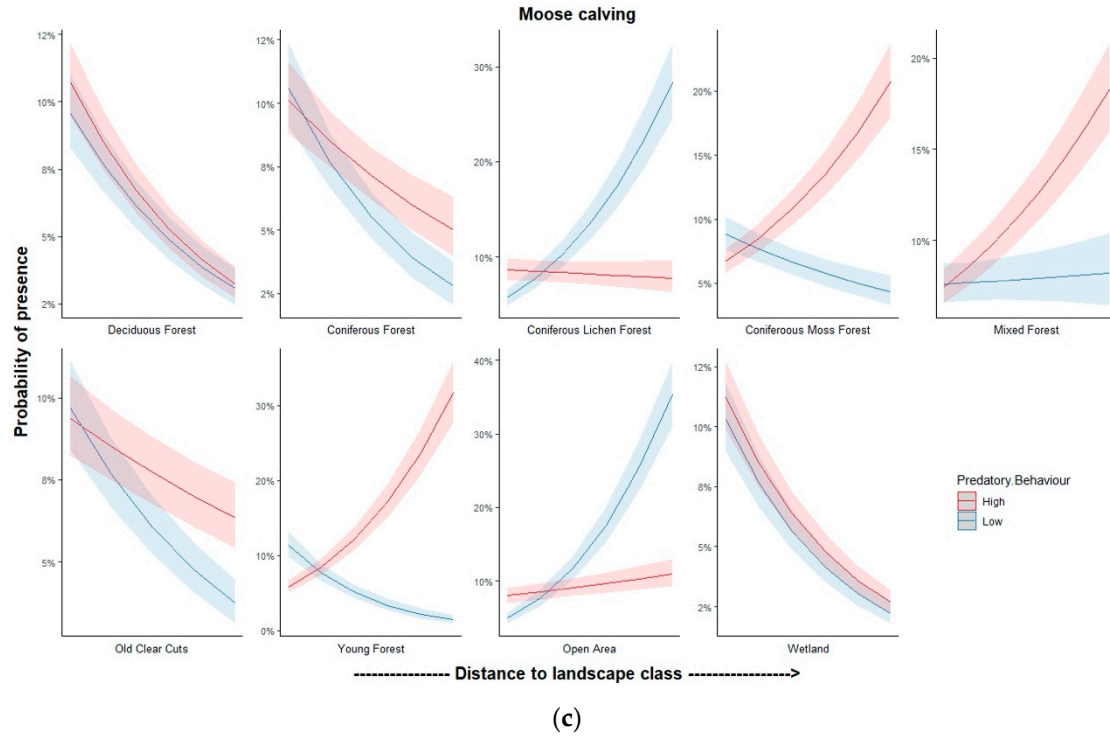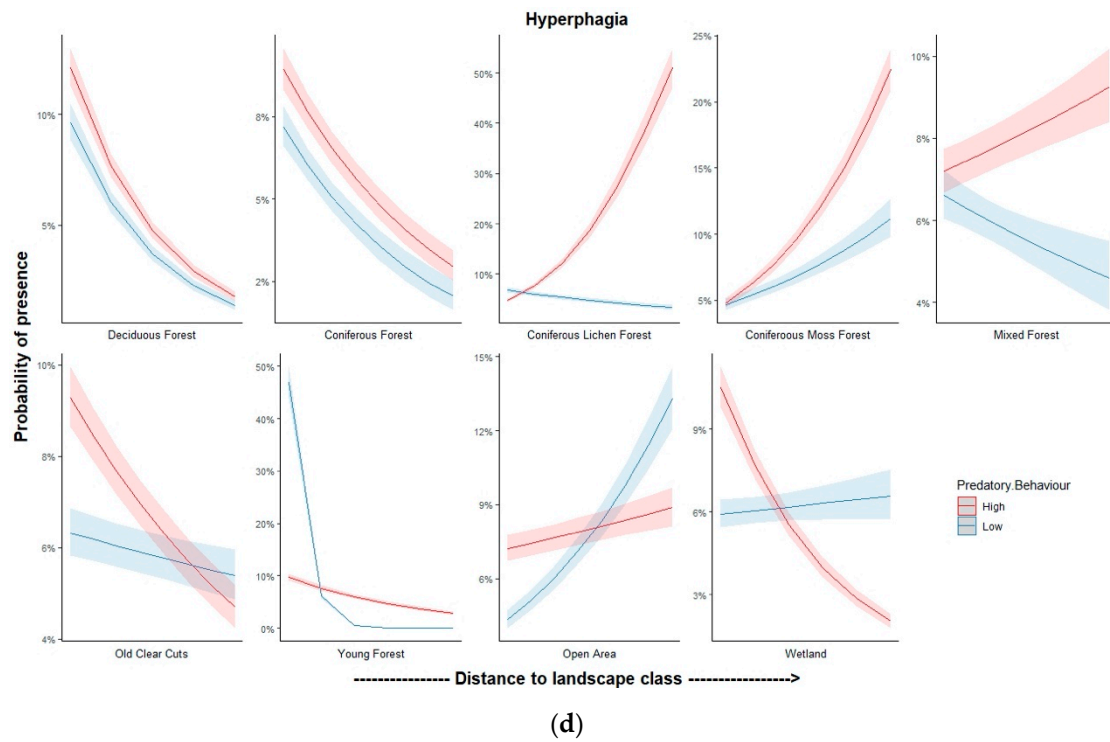

**Figure S1.** Predictive models for the habitat selection of brown bears in northern Sweden in relation to their predatory behaviour during (a) pre-calving, (b) reindeer calving, (c) moose calving, and (d) hyperphagia (post-calving) periods.
