# Supplementary material
Source: MDPI journal article supplement (https://www.mdpi.com/1424-2818/13/12/678)
Supplement: s1 [file s1]

**Table S1.** Maximum distance (km) to public roads with regular traffic and gravel roads during each calving period.

| Study Period     | Distance to Public Roads with Regular |                               |
|------------------|---------------------------------------|-------------------------------|
|                  | Traffic (km)                          | Distance to Gravel Roads (km) |
| Pre-calving      | 24.12                                 | 9.57                          |
| Reindeer calving | 24.12                                 | 13.06                         |
| Moose calving    | 24.10                                 | 14.95                         |
| Post-calving     | 23.67                                 | 14.89                         |
